# Supplementary material for: The selective intercalation of organic carboxylates and sulfonates into hydroxy double salts
Source: Royal Society of Chemistry journal article supplement (doi:10.1039/c2jm32257a), 2012-01-01
Supplement: c2jm32257a.pdf [file c2jm32257a.pdf]

**Supporting information for:**

**The selective intercalation of organic carboxylates and  
sulfonates into hydroxy double salts**

*Gareth R. Williams,<sup>1\*</sup> John Crowder,<sup>1</sup> Jonathan C. Burley<sup>2</sup> and Andrew M. Fogg<sup>3</sup>*

<sup>1</sup> *School of Human Sciences, Faculty of Life Sciences, London Metropolitan University, 166-220 Holloway Road, London, N7 8DB.*

<sup>2</sup> *Laboratory of Biophysics and Surface Analysis, School of Pharmacy, Boots Science Building, University of Nottingham, University Park, Nottingham, NG7 2RD.*

<sup>3</sup> *Department of Chemistry, University of Liverpool, Crown Street, Liverpool, L69 7ZD*

*\* Author for correspondence. Email: [g.williams@londonmet.ac.uk](mailto:g.williams@londonmet.ac.uk); tel: +44 (0) 207 133 2565; fax: +44 (0) 207 133 4149.*

## Tables

**Table S1:** Selective uptake of BDC isomers by  $\text{Zn}_5\text{-NO}_3$  after reaction in water for 6 days with a 4-fold excess of each guest. Data are given as mean and standard deviation (S.D.) from three independent experiments. Percentages may not add up to 100 % owing to rounding to 1 d.p.

| T / °C | % of 1,2-BDC intercalated |      | % of 1,4-BDC intercalated |      |
|--------|---------------------------|------|---------------------------|------|
|        | Mean                      | S.D. | Mean                      | S.D. |
| 20     | 4.9                       | 0.4  | 95.2                      | 0.4  |
| 40     | 0.7                       | 1.2  | 99.3                      | 1.2  |
| 60     | 1.4                       | 1.2  | 98.6                      | 1.2  |
| 80     | 2.0                       | 0    | 98.0                      | 0    |
| 100    | 2.0                       | 0.2  | 98.0                      | 0.2  |

**Table S2:** Selective uptake of BDC isomers by  $\text{Zn}_5\text{-NO}_3$  after reaction in water for 4 days with a 4-fold excess of each guest. Data are given as mean and standard deviation (S.D.) from three independent experiments. Percentages may not add up to 100 % owing to rounding to 1 d.p.

| T / °C | % of 1,2-BDC intercalated |      | % of 1,4-BDC intercalated |      |
|--------|---------------------------|------|---------------------------|------|
|        | Mean                      | S.D. | Mean                      | S.D. |
| 20     | 5.4                       | 0.2  | 94.6                      | 0.2  |
| 40     | 2.6                       | 1.0  | 97.4                      | 1.0  |
| 60     | 2.0                       | 0    | 98.0                      | 0    |
| 80     | 0                         | 0    | 100                       | 0    |
| 100    | 1.0                       | 1.0  | 99.0                      | 1.0  |

**Table S3:** Selective uptake of BDC isomers by  $\text{Zn}_5\text{-NO}_3$  after reaction in water/acetone for 6 days with a 4-fold excess of each guest. Data are given as mean and standard deviation (S.D.) from three independent experiments. Percentages may not add up to 100 % owing to rounding to 1 d.p.

| T / °C | % of 1,2-BDC intercalated |      | % of 1,4-BDC intercalated |      |
|--------|---------------------------|------|---------------------------|------|
|        | Mean                      | S.D. | Mean                      | S.D. |
| 20     | 5.4                       | 0.3  | 94.6                      | 0.3  |
| 40     | 4.3                       | 0.5  | 95.7                      | 0.5  |
| 60     | 0                         | 0    | 100                       | 0    |
| 80     | 1.3                       | 1.2  | 98.7                      | 1.2  |
| 100    | 0.7                       | 1.2  | 99.3                      | 1.2  |

**Table S4:** Selective uptake of BDC isomers by  $\text{Zn}_5\text{-NO}_3$  after reaction in water/acetone for 4 days with a 4-fold excess of each guest. Data are given as mean and standard deviation (S.D.) from three independent experiments. Percentages may not add up to 100 % owing to rounding to 1 d.p.

| T / °C | % of 1,2-BDC intercalated |      | % of 1,4-BDC intercalated |      |
|--------|---------------------------|------|---------------------------|------|
|        | Mean                      | S.D. | Mean                      | S.D. |
| 20     | 6.7                       | 0.8  | 93.4                      | 0.8  |
| 60     | 2.9                       | 1.6  | 97.1                      | 1.6  |
| 80     | 1.3                       | 0.6  | 98.7                      | 0.6  |
| 100    | 2.0                       | 0    | 98.0                      | 0    |

**Table S5:** Selective uptake of BDC isomers by  $\text{Zn}_5\text{-NO}_3$  after reaction in water for 6 days with a varying excess of each guest. Data are given as mean and standard deviation (S.D.) from three independent experiments. Percentages may not add up to 100 % owing to rounding to 1 d.p.

| BDC excess | T / °C | % of 1,2-BDC intercalated |      | % of 1,4-BDC intercalated |      |
|------------|--------|---------------------------|------|---------------------------|------|
|            |        | Mean                      | S.D. | Mean                      | S.D. |
| 2-fold     | 20     | 4.2                       | 0.6  | 95.8                      | 0.6  |
|            | 40     | 2.3                       | 0.1  | 97.7                      | 0.1  |
|            | 100    | 1.0                       | 1.4  | 99.0                      | 1.4  |
| 1-fold     | 20     | 7.4                       | 0.6  | 92.6                      | 0.6  |
|            | 40     | 3.0                       | 1.3  | 97.0                      | 1.3  |
|            | 60     | 2.0                       | 0    | 98.0                      | 0    |
|            | 100    | 0                         | 0    | 100                       | 0    |

**Table S6:** Selective uptake of NDS isomers by  $\text{Zn}_5\text{-NO}_3$  after reaction in water for 6 days with a 4-fold excess of each guest. Data are given as mean and standard deviation (S.D.) from three independent experiments. Percentages may not add up to 100 % owing to rounding to 1 d.p.

| <b>T / °C</b> | <b>% of 1,5-NDS intercalated</b> |             | <b>% of 2,6-NDS intercalated</b> |             |
|---------------|----------------------------------|-------------|----------------------------------|-------------|
|               | <b>Mean</b>                      | <b>S.D.</b> | <b>Mean</b>                      | <b>S.D.</b> |
| 20            | 0                                | 0           | 100                              | 0           |
| 40            | 8.2                              | 2.1         | 91.8                             | 2.1         |
| 60            | 0.9                              | 1.6         | 99.1                             | 1.6         |
| 80            | 0.2                              | 0.3         | 99.8                             | 0.3         |
| 100           | 3.2                              | 1.0         | 96.8                             | 1.0         |

**Table S7:** Selective uptake of NDS isomers by  $\text{Zn}_5\text{-NO}_3$  after reaction in water for 4 days with a 4-fold excess of each guest. Data are given as mean and standard deviation (S.D.) from three independent experiments. Percentages may not add up to 100 % owing to rounding to 1 d.p.

| <b>T / °C</b> | <b>% of 1,5-NDS intercalated</b> |             | <b>% of 2,6-NDS intercalated</b> |             |
|---------------|----------------------------------|-------------|----------------------------------|-------------|
|               | <b>Mean</b>                      | <b>S.D.</b> | <b>Mean</b>                      | <b>S.D.</b> |
| 20            | 0                                | 0           | 100                              | 0           |
| 40            | 5.5                              | 2.8         | 94.5                             | 2.8         |
| 60            | 2.1                              | 0.3         | 97.9                             | 0.3         |
| 80            | 1.8                              | 0.4         | 98.2                             | 0.4         |
| 100           | 0.4                              | 0.8         | 99.6                             | 0.8         |

## Figures

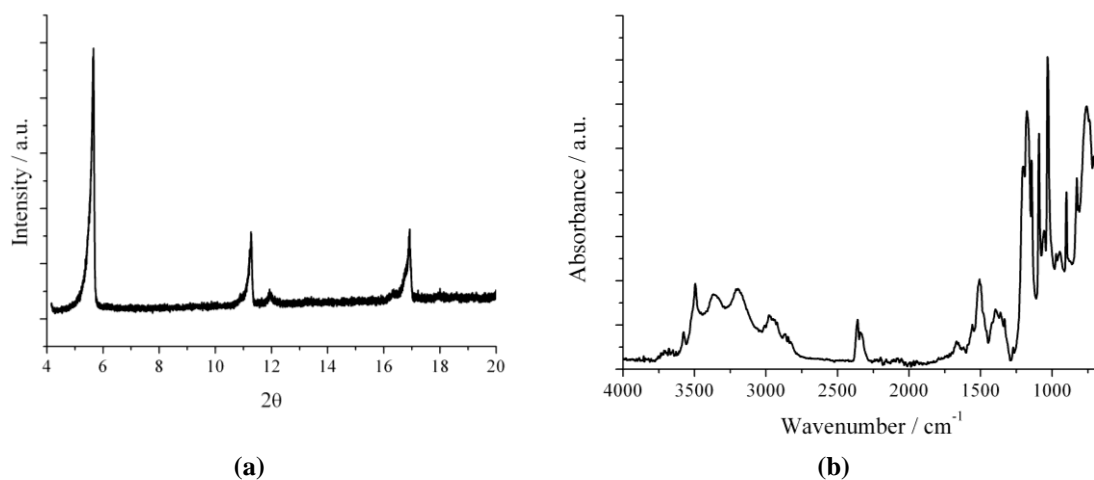

**Figure S1:** (a) X-ray diffraction pattern and (b) IR spectrum for the 2,6-NDS intercalate of  $\text{Zn}_5\text{-NO}_3$ .

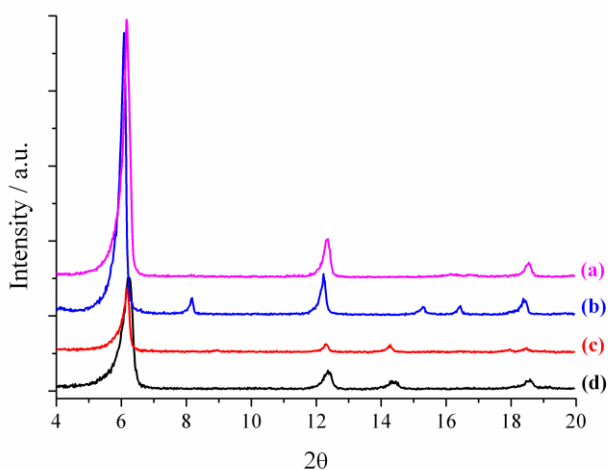

**Figure S2:** X-ray diffraction patterns of the 1,4-BDC intercalates of (a)  $\text{Zn}_3\text{Ni}_2\text{-NO}_3$ ; (b)  $\text{Zn}_{3.8}\text{Co}_{1.2}\text{-NO}_3$ ; (c)  $\text{Zn}_5\text{-acetate}$ ; and, (d)  $\text{Zn}_5\text{-Cl}$ .

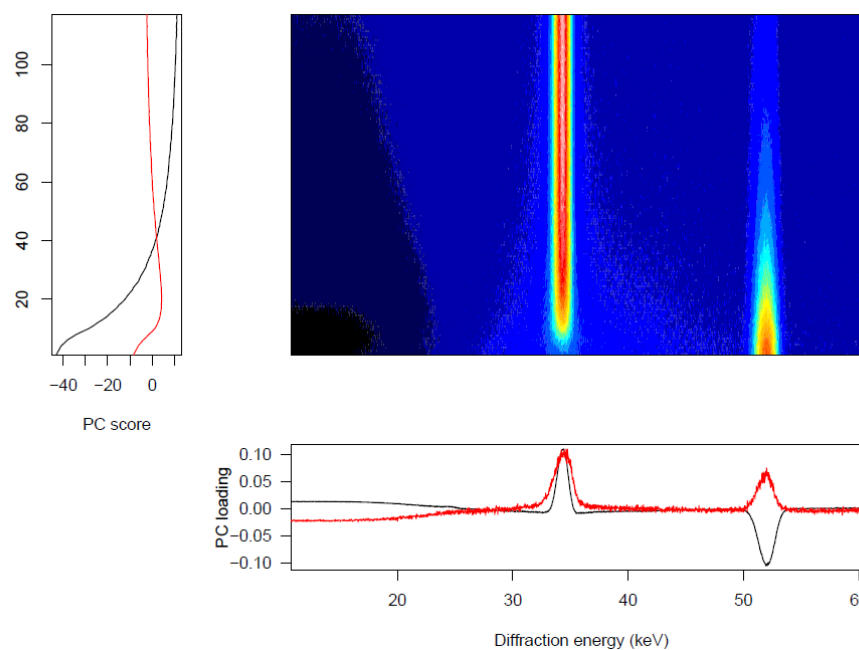

**Figure S3:** PCA of *in situ* EDXRD data for the intercalation of 1,4-BDC into  $\text{Zn}_5\text{-(NO}_3)_2$  at 80 °C. Principal component (PC) 1 is shown in black, and PC2 in red.

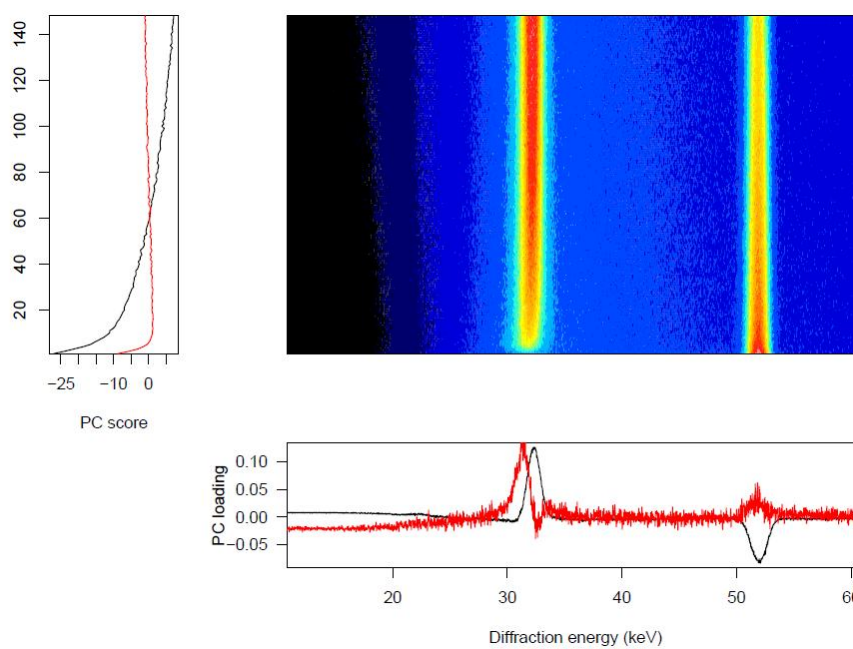

**Figure S4:** PCA of *in situ* EDXRD data for the intercalation of 1,2-BDC into  $\text{Zn}_5\text{-(NO}_3)_2$  at 80 °C. Principal component (PC) 1 is shown in black, and PC2 in red.

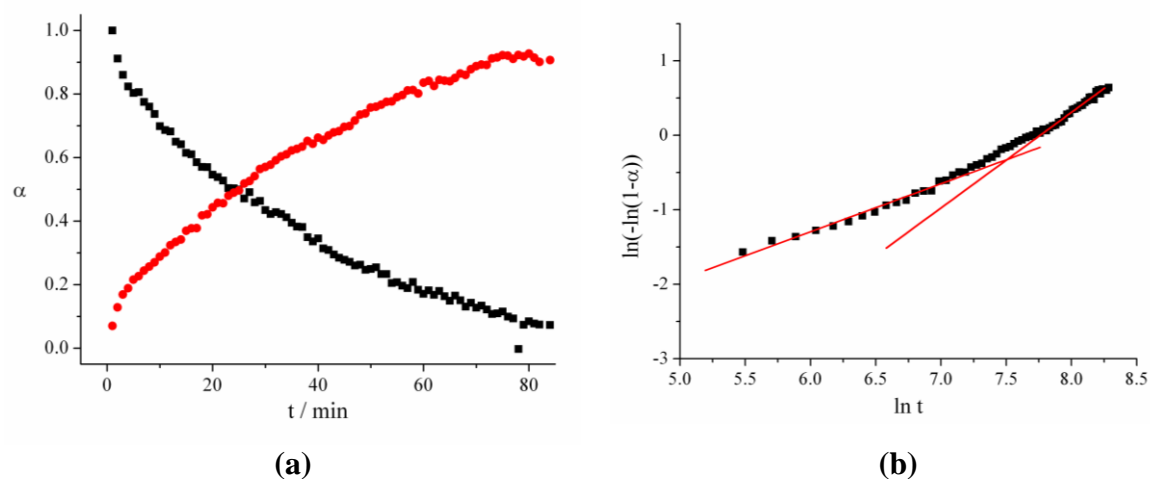

**Figure S5:** EDXRD data for the intercalation of 1,2-BDC into  $\text{Zn}_5\text{-NO}_3$  at 90 °C. (a) Extent of reaction vs. time plots for the 200 reflections of  $\text{Zn}_5\text{-NO}_3$  (■) and  $\text{Zn}_5\text{-1,2-BDC}$  (●). (b) Sharp-Hancock plot showing the discontinuity in mechanism.

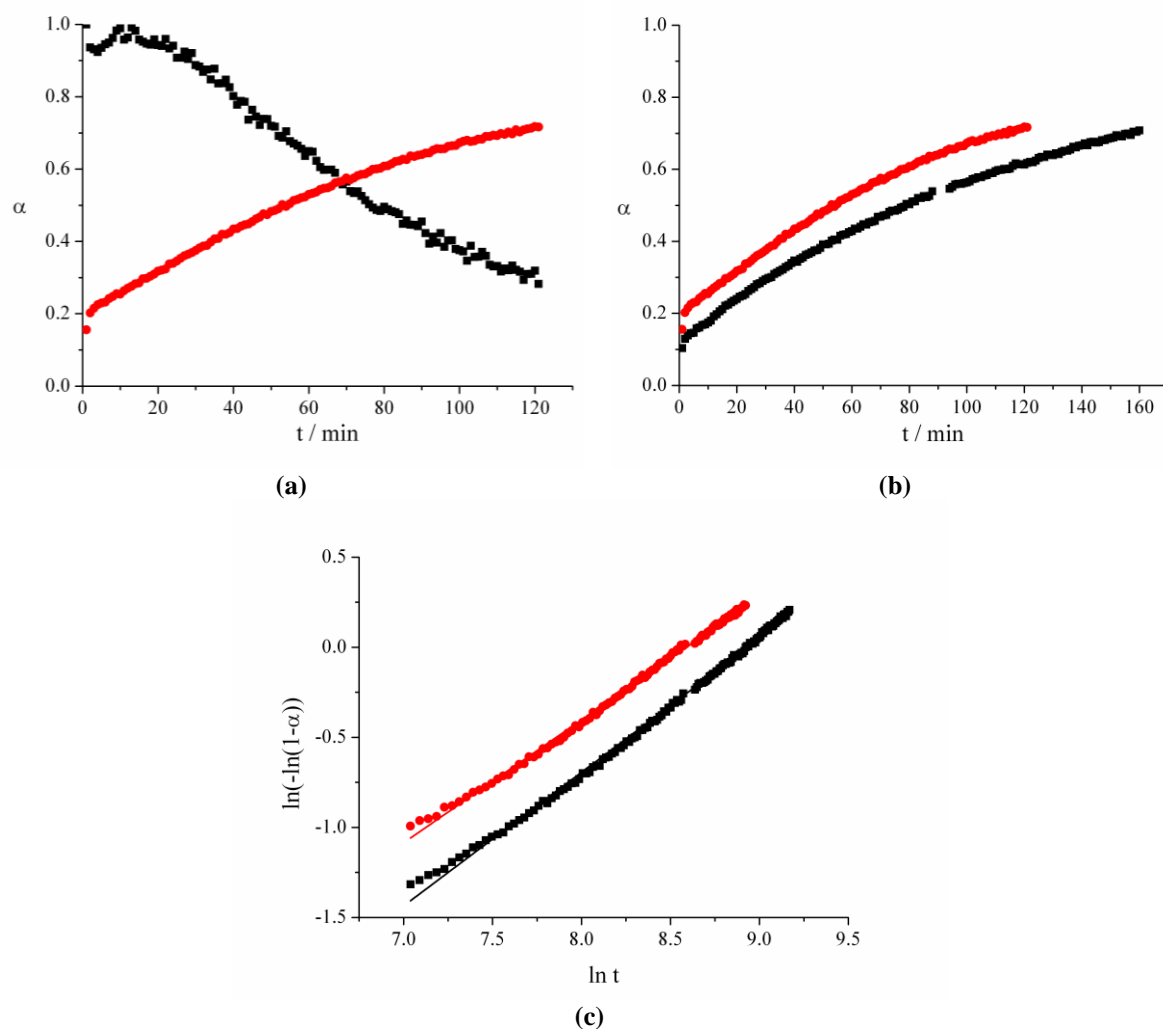

**Figure S6:** EDXRD data for the intercalation of 1,4-BDC into  $Zn_5-Cl$ . **(a)** Extent of reaction vs. time plots for the 200 reflections of  $Zn_5-Cl$  (■) and  $Zn_5-1,4-BDC$  (●) at 90 °C. **(b)** Extent of reaction vs. time plots showing the growth of the  $Zn_5-1,4-BDC$  200 reflection at 80 (■) and 90 °C (●). **(c)** Sharp-Hancock plots at 80 (■) and 90 °C (●).



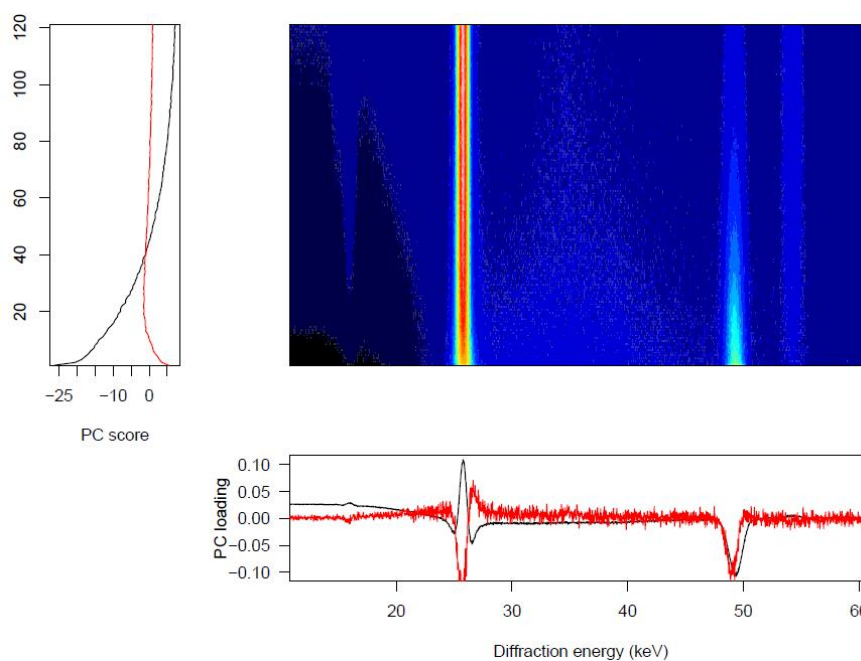

**Figure S7:** PCA of *in situ* EDXRD data for the intercalation of 1,4-BDC into  $\text{Zn}_5\text{-Cl}$  at 90 °C. Principal component (PC) 1 is shown in black, and PC2 in red.

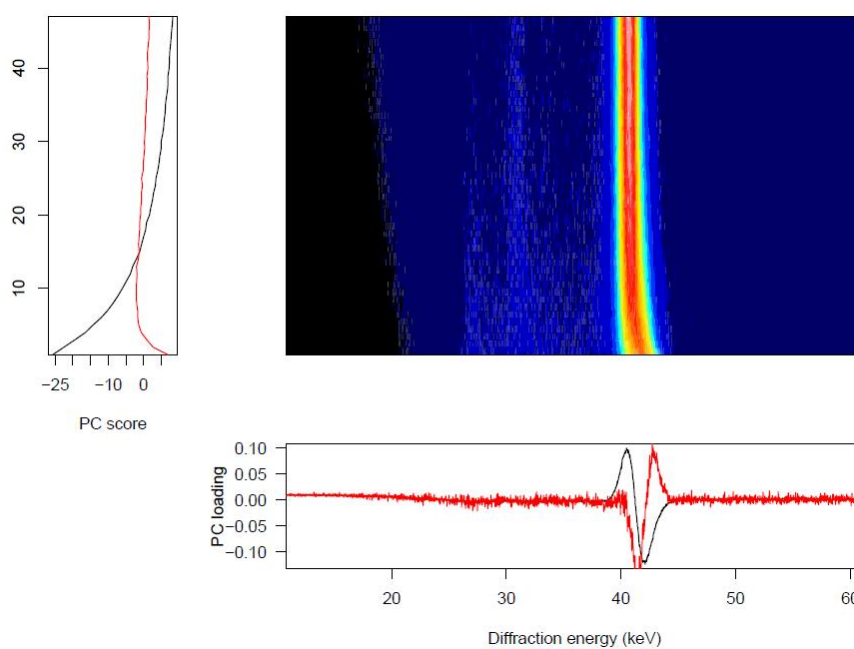

**Figure S8:** PCA of *in situ* EDXRD data for the intercalation of 1,2-BDC into  $\text{Zn}_5\text{-acetate}$  at 90 °C. Principal component (PC) 1 is shown in black, and PC2 in red

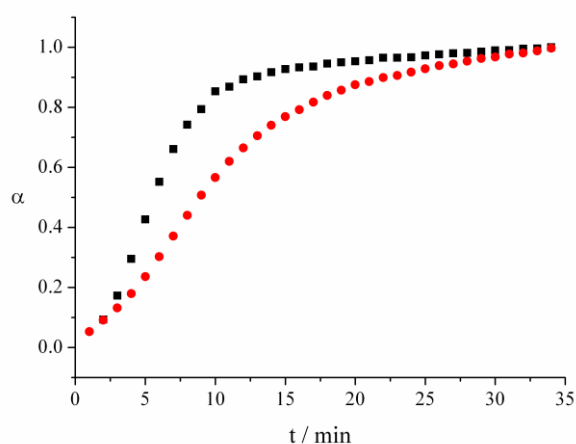

**Figure S9:** EDXRD data for the intercalation of 1,2-BDC and 1,4-BDC into Zn<sub>3.8</sub>Co<sub>1.2</sub>-NO<sub>3</sub> showing the growth in the 200 reflections of Zn<sub>3.8</sub>Co<sub>1.2</sub>-1,2-BDC (■) and Zn<sub>3.8</sub>Co<sub>1.2</sub>-1,4-BDC (●) at 80 °C.

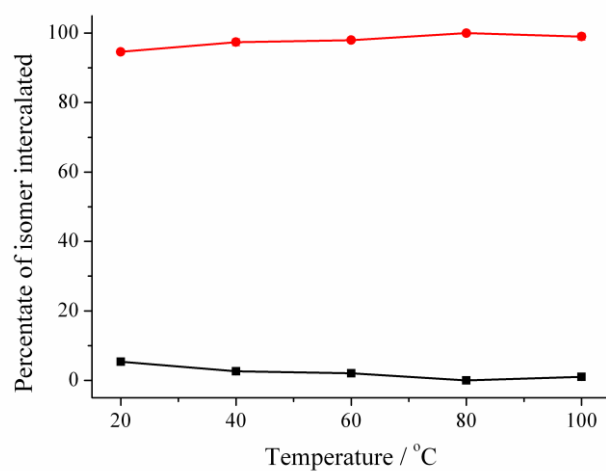

**Figure S10:** The results of the competitive intercalation of 1,2- (■) and 1,4-BDC (●) into Zn<sub>5</sub>-NO<sub>3</sub> for 4 days in water, with a 4-fold excess of each guest used. Experiments were performed in triplicate and mean ± S.D. are plotted (error bars are so small as to be contained within the points on the graph here).

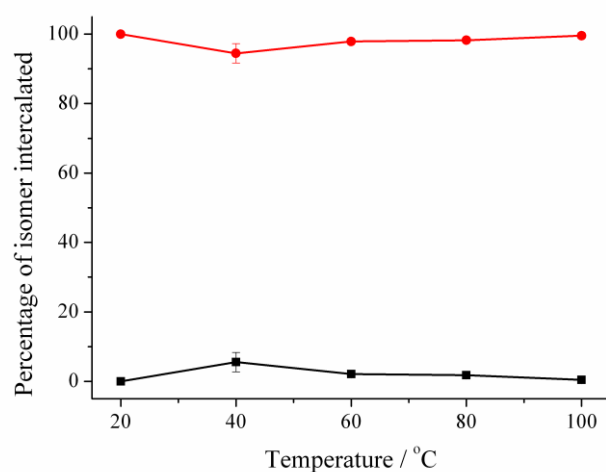

**Figure S11:** The results of the competitive intercalation of 1,5- (■) and 2,6-NDS (●) into  $\text{Zn}_5\text{-NO}_3$  for 4 days in water, with a 4-fold excess of each guest used. Experiments were performed in triplicate and mean  $\pm$  S.D. are plotted (error bars are so small as to be mostly contained within the points on the graph).

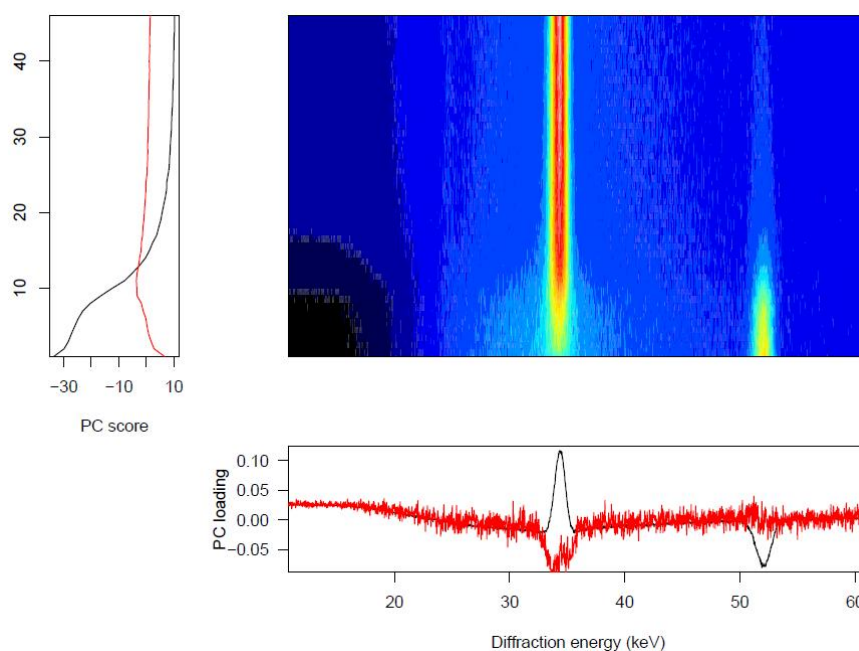

**Figure S12:** PCA of *in situ* EDXRD data for the intercalation of a mixture of 1,2- and 1,4-BDC into  $\text{Zn}_5\text{-NO}_3$  at 90 °C. Principal component (PC) 1 is shown in black, and PC2 in red.
